# Supplementary material for: Extreme Climatic Events to Intensify in the Lake Victoria Basin Under Global Warming
Source: Preprints.org preprint supplement (doi:10.20944/preprints202107.0584.v2), 2023-03-06
Supplement: Supplementary file 1 [file supplementary]

**Extreme climatic events to intensify in the Lake Victoria Basin under global warming**

Obed M. Ogegaa,b, Enrico Scoccimarroc, Herbert Misianid, and James Mbuguae

**Supplementary information**

# List of figures

Fig. S 1: Climatology of the study domain for the period 1985-2014 3

Fig. S 2: Annual (ANN) climatology differences between model data and MSWEP data, for the period 1985-2014. Stippling shows significant values at 99% confidence level. All units are in mm/month 4

Fig. S 3: As in Fig. S 2 but for MAM 5

Fig. S 4: As in Fig. S 2 but for JJA 6

Fig. S 5: As in Fig. S 2 but for OND 7

Fig. S 6: Changes in mean annual (ANN) precipitation climatology for the period 2040-2069 (MID-CTLl) and 2070-2099 (FUT-CTL) relative to the 1985-2014 period (CTL), for all models and an ensemble mean for the top-five models identified in subsection 3.1 (ENStop5). Stippling shows significant values (at 99% confidence level). All units are in mm/month 8

Fig. S 7: As in Fig. S 6 but for MAM 9

Fig. S 8: As in Fig. S 6 but for JJA 10

Fig. S 9: As in Fig. S 6 but for OND 11

Fig. S 10: Changes in the maximum 5-day precipitation (Rx5day) climatology for the period 2040-2069 (MID-CTLl) and 2070-2099 (FUT-CTL) relative to the 1985-2014 period (CTL), for all models and an ensemble mean for the top-five models (ENStop5). Stippling shows significant values at 99% confidence level. All units are in mm 12

Fig. S 11: As in Fig. S 10 but for SDII 13

Fig. S 12: As in Fig. S 10 but for 99p90p. Units are in mm 14

# List of tables

Table S 1: NEX-GDDP-CMIP6 datasets used in the study. All the data have a spatial resolution of 0.25 degrees x 0.25 degree and are based on SSP5-8.5. More information about the models is available at https://esgf-node.llnl.gov/search/cmip6/ 1

# Methodology

Table S 1: NEX-GDDP-CMIP6 datasets used in the study. All the data have a spatial resolution of 0.25 degrees x 0.25 degree and are based on SSP5-8.5. More information about the models is available at <https://esgf-node.llnl.gov/search/cmip6/>

| Model ID (Variant)  [Hereinafter] | Institution | Main reference |
| --- | --- | --- |
| CMCC-ESM2 (r1i1p1f1)  [CMCC] | Centro Euro-Mediterraneo sui Cambiamenti Climatici (CMCC), Italy | 1 |
| CNRM-ESM2-1 (r1i1p1f2)  [CNRM] | Centre National de Recherches Météorologiques (CNRM) and Centre Européen de Recherche et de Formation Avancée en Calcul Scientifique (CERFACS), France | 2 |
| EC-Earth3 (r1i1p1f1)  [EC] | Consortium Europe | 3 |
| FGOALS-g3 (r3i1p1f1)  [FGOALS] | Chinese Academy of Sciences (CAS), China | 4 |
| GFDL-ESM4 (r1i1p1f1)  [GFDL] | National Oceanic and Atmospheric Administration, Geophysical Fluid Dynamics Laboratory (NOAA), USA | 5 |
| IPSL-CM6A-LR (r1i1p1f1)  [IPSL] | Institut PierreSimon Laplace (IPSL), France | 6 |
| KACE-1-0-G (r1i1p1f1)  [KACE] | National Institute of Meteorological Sciences, Korea Meteorological Administration (NIMS-KMA), Republic of Korea | 7 |
| MIROC-ES2L (r1i1p1f2)  [MIROC] | Japan Agency for Marine-Earth Science and Technology, Atmosphere and Ocean Research Institute, Japan | 8 |
| MIROC6 (r1i1p1f1)  [MIROC6] | 9 |
| MPI-ESM1-2-HR (r1i1p1f1)  [MPI_HR] | Max Planck Institute for Meteorology (MPI), Germany | 10 |
| MPI-ESM1-2-LR (r1i1p1f1)  [MPI_LR] | 11 |
| MRI-ESM2-0 (r1i1p1f1)  [MRI] | Meteorological Research Institute (MRI), Japan | 12 |
| NESM3 (r1i1p1f1)  [NESM3] | Nanjing University of Information Science and Technology (NUIST), China | 13 |
| NorESM2-LM (r1i1p1f1)  [NorESM2_LM] | NorESM Climate Modelling Consortium (NCC), Norway | 14 |
| NorESM2-MM (r1i1p1f1)  [NorESM2_MM] |
| TaiESM1 (r1i1p1f1)  [TaiESM1] | Research Center for Environmental Changes, Academia Sinica Taiwan (AS-RCEC), China | 15 |
| UKESM1-0-LL (r1i1p1f2)  [UKESM1] | Met Office-NERC, United Kingdom | 16 |

# Results and discussion


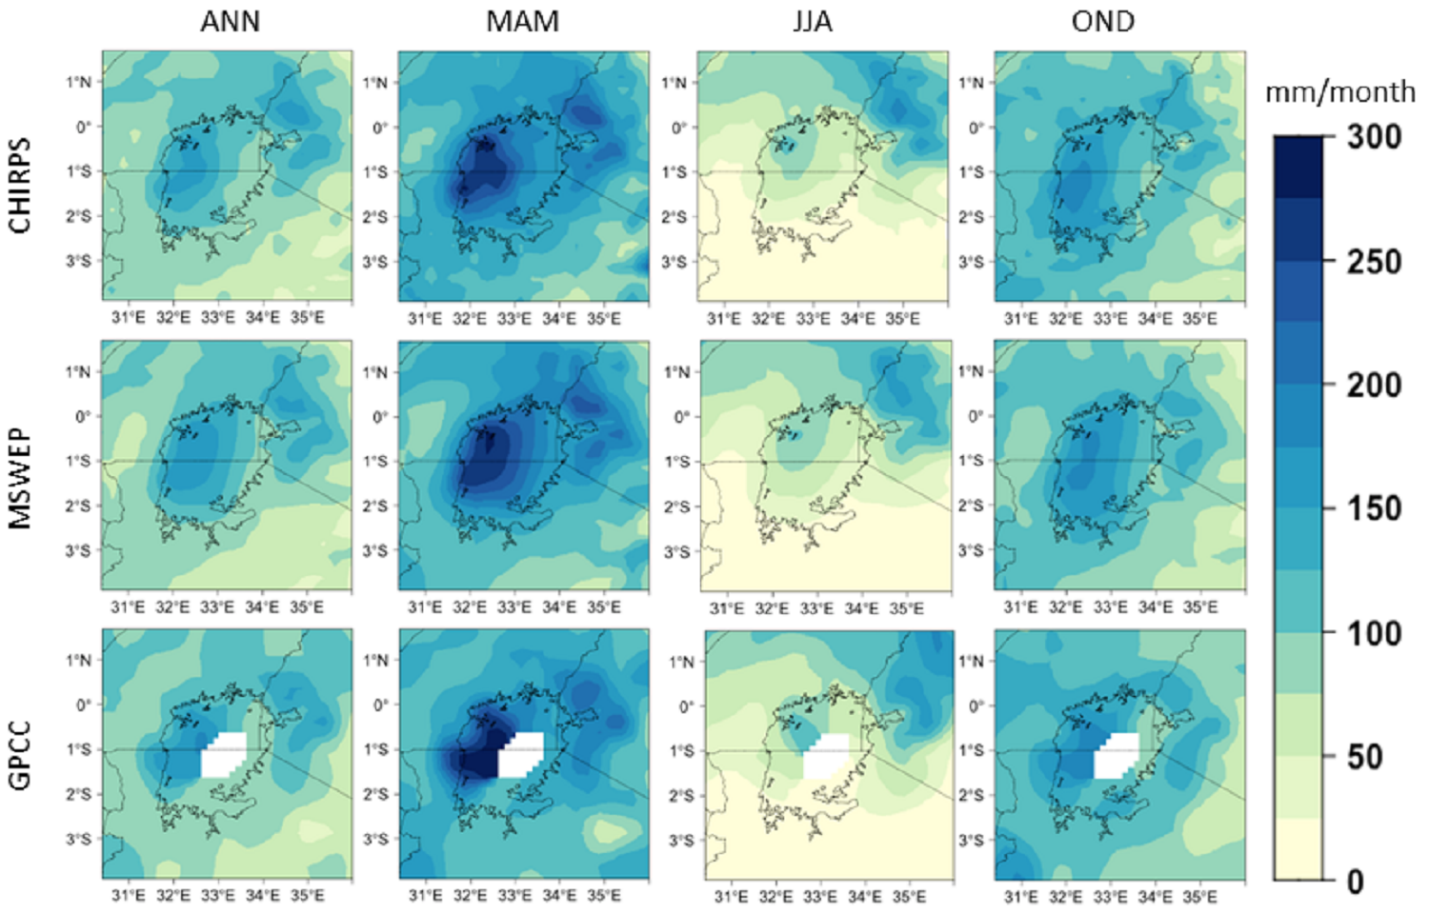


Fig. S 1: Climatology of the study domain for the period 1985-2014


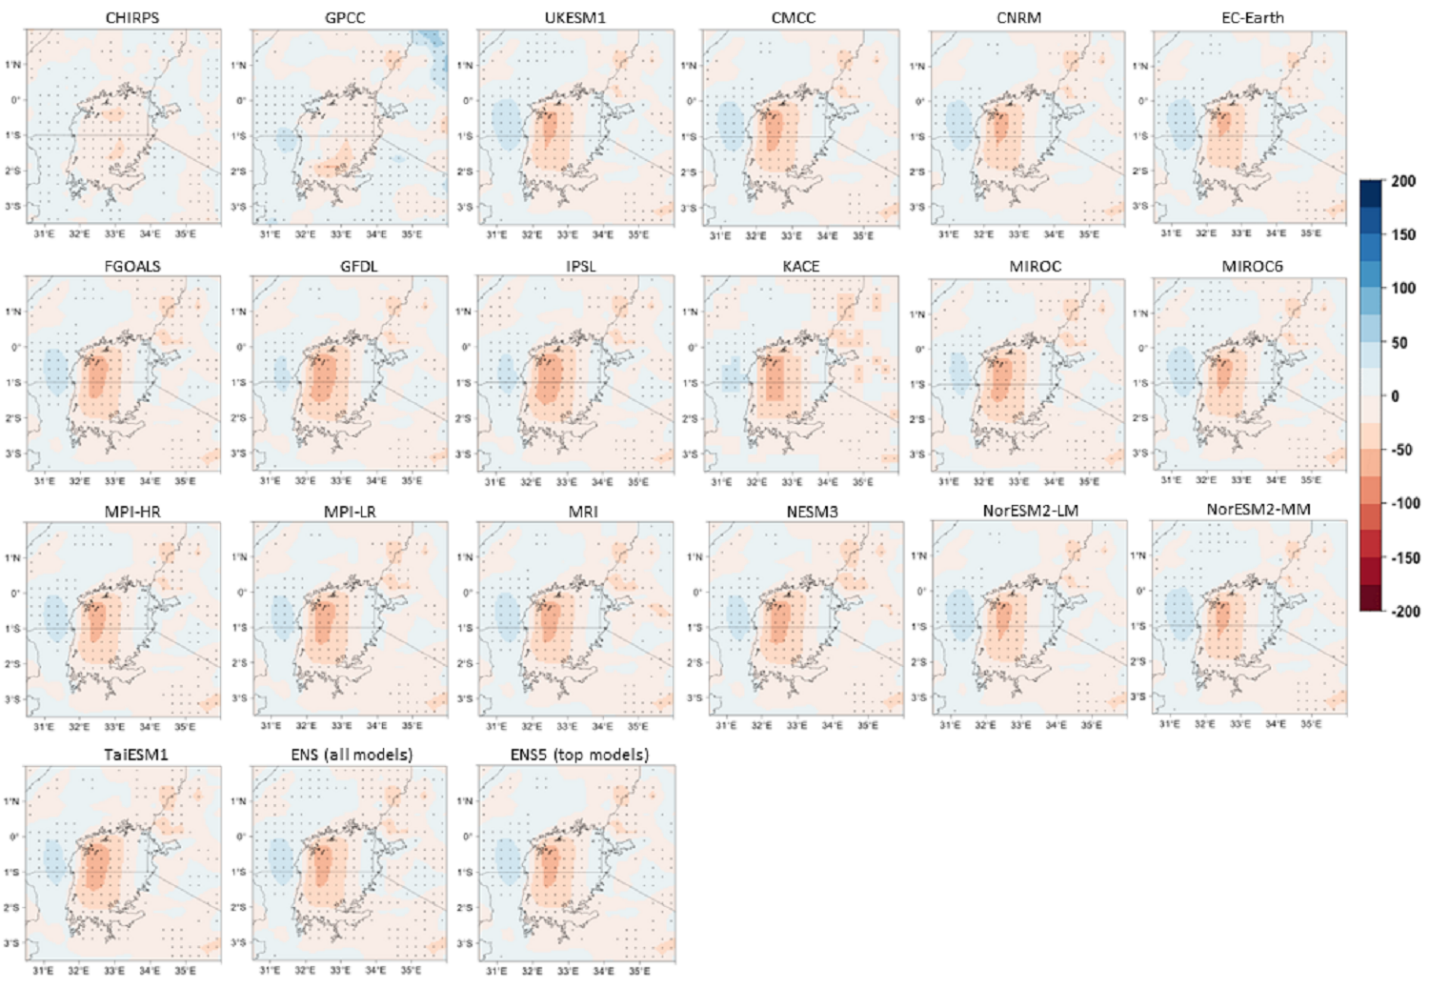


Fig. S 2: Annual (ANN) climatology differences between model data and MSWEP data, for the period 1985-2014. Stippling shows significant values at 99% confidence level. All units are in mm/month


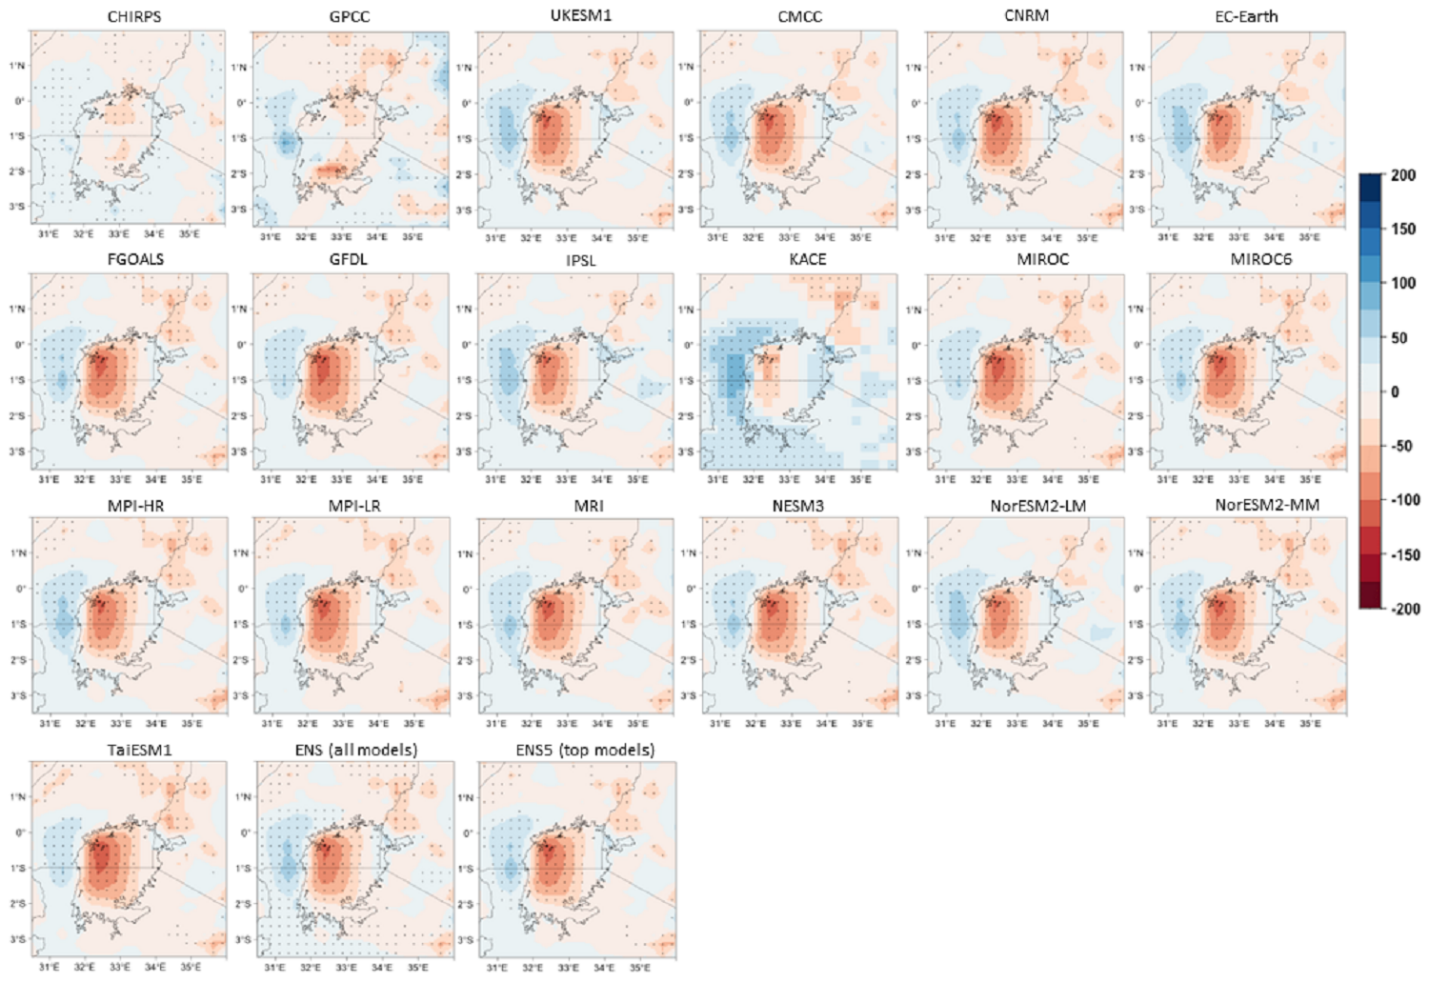


Fig. S 3: As in Fig. S 2 but for MAM


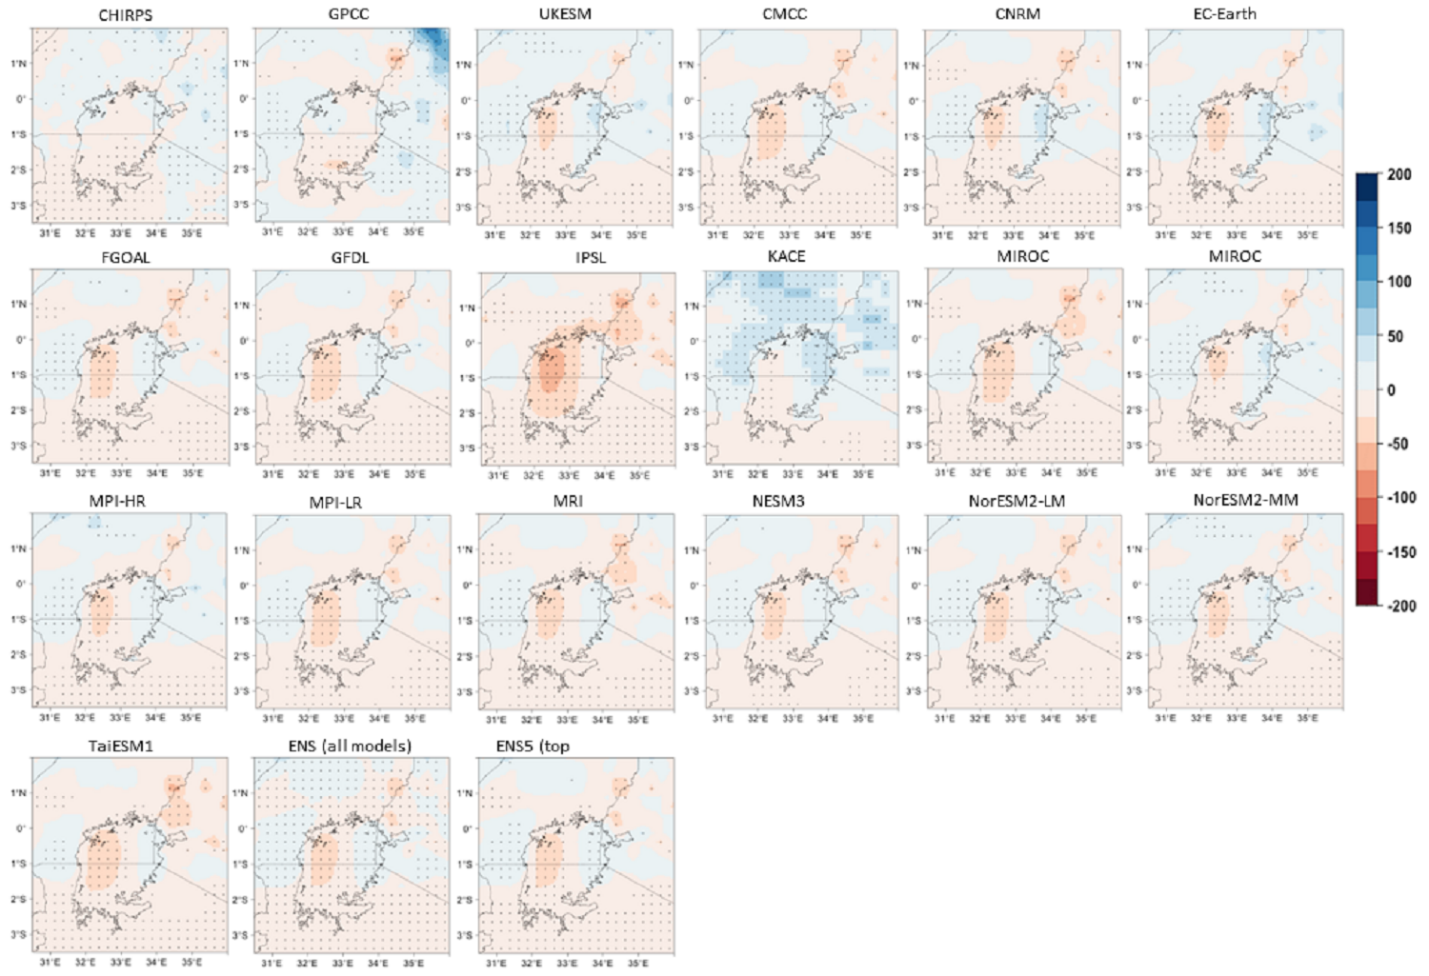


Fig. S 4: As in Fig. S 2 but for JJA


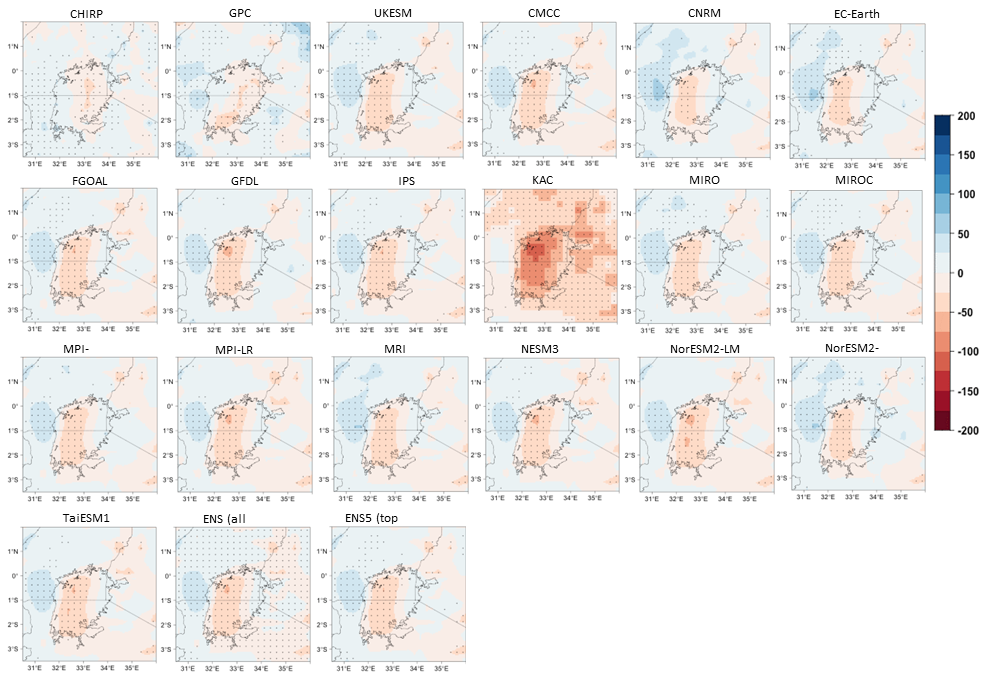


Fig. S 5: As in Fig. S 2 but for OND


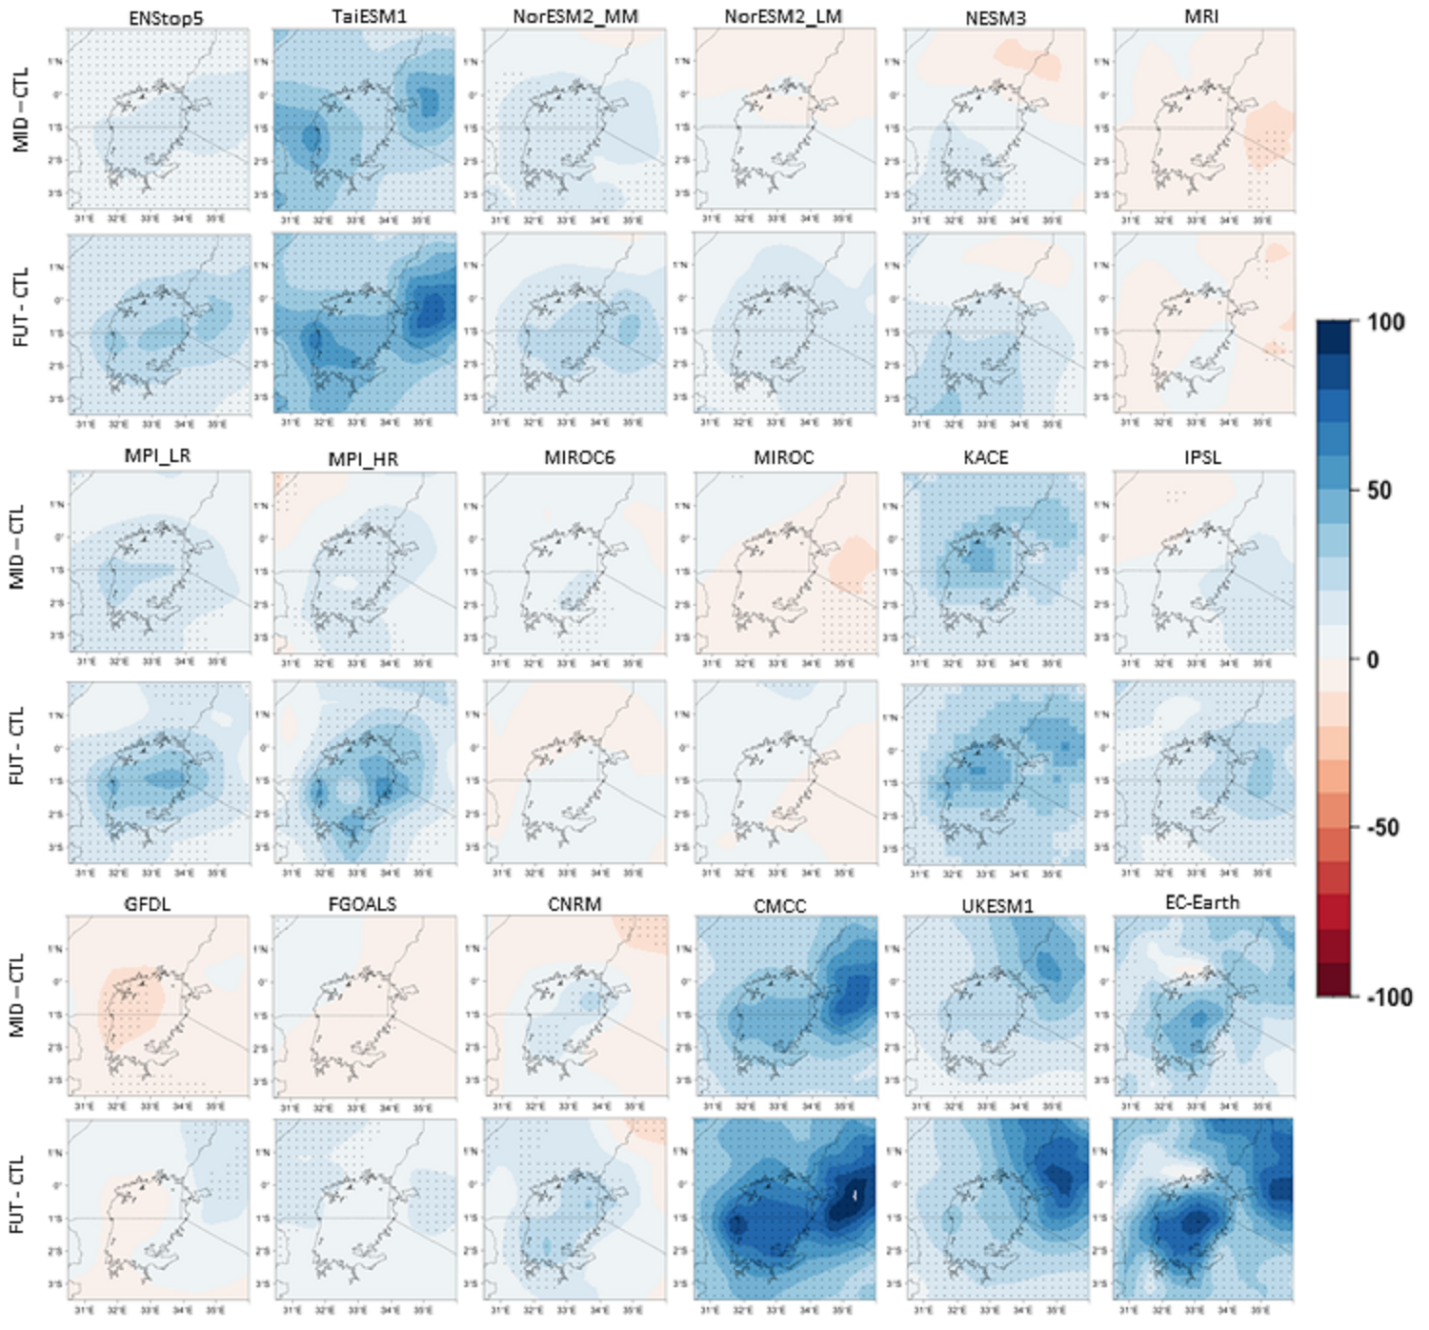


Fig. S 6: Changes in mean annual (ANN) precipitation climatology for the period 2040-2069 (MID-CTLl) and 2070-2099 (FUT-CTL) relative to the 1985-2014 period (CTL), for all models and an ensemble mean for the top-five models identified in subsection 3.1 (ENStop5). Stippling shows significant values (at 99% confidence level). All units are in mm/month


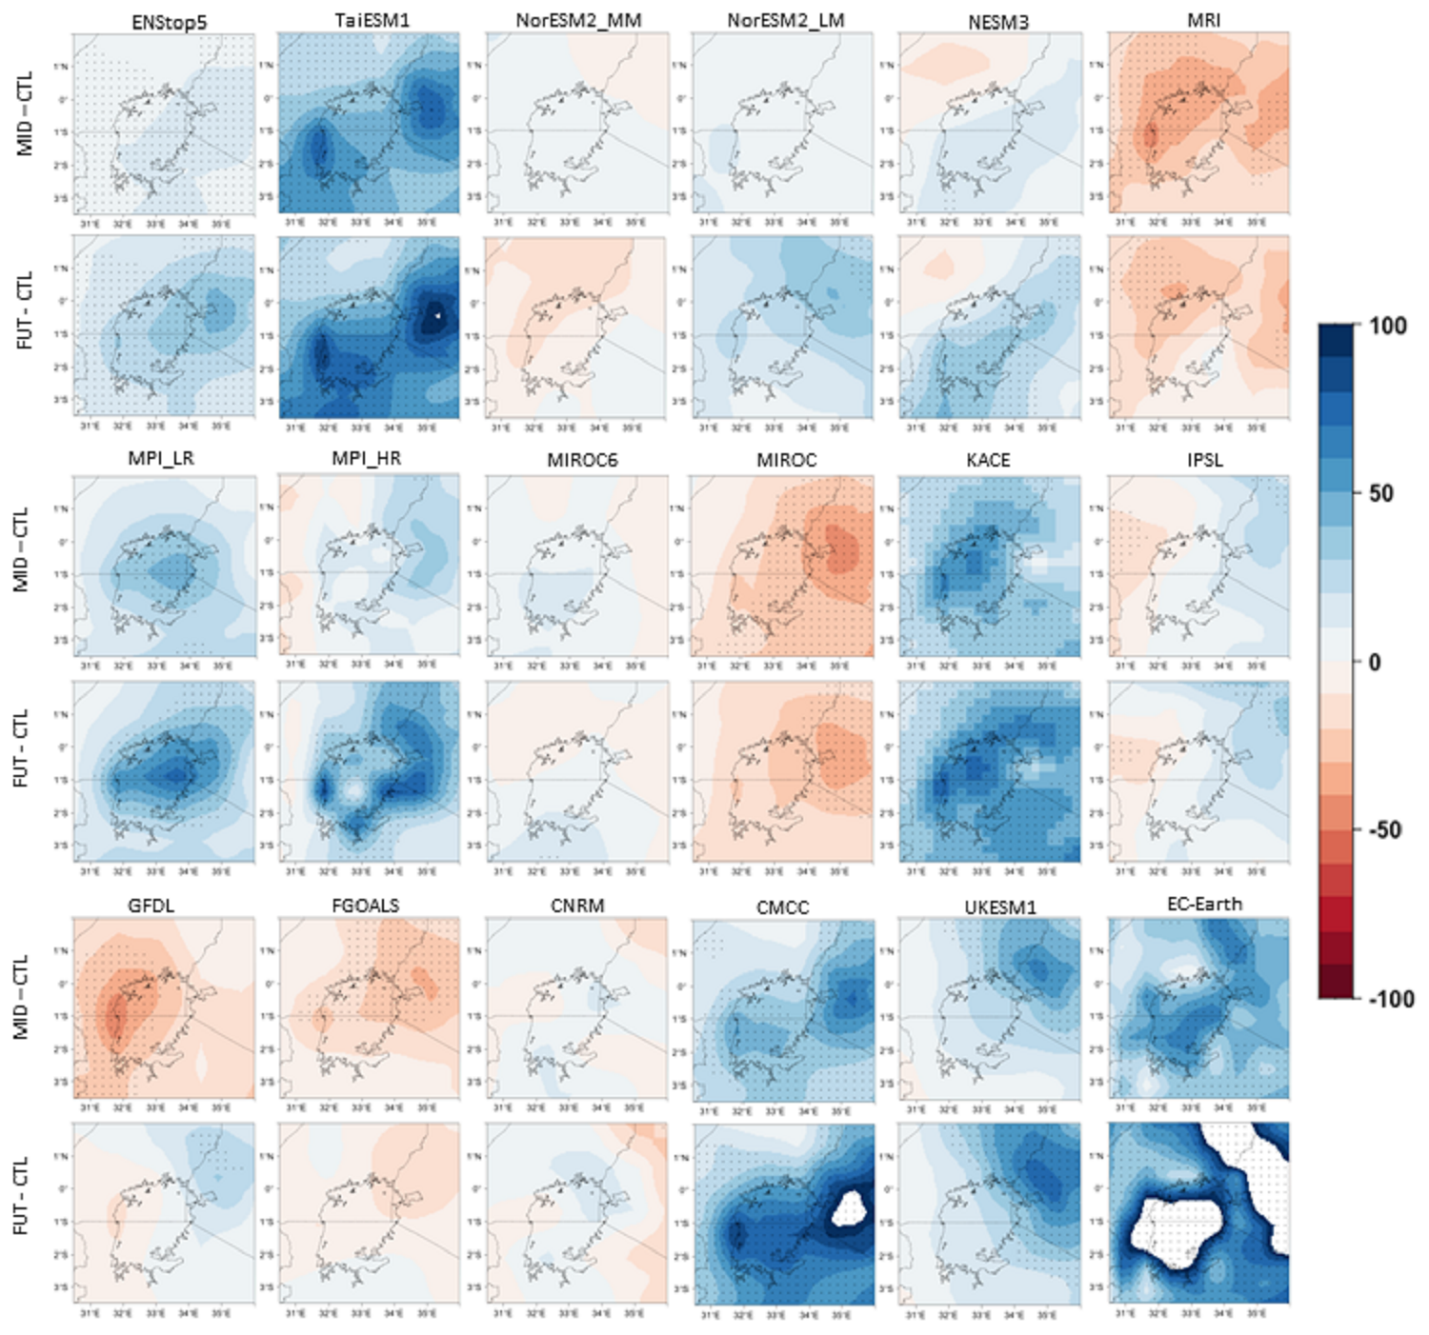


Fig. S 7: As in Fig. S 6 but for MAM


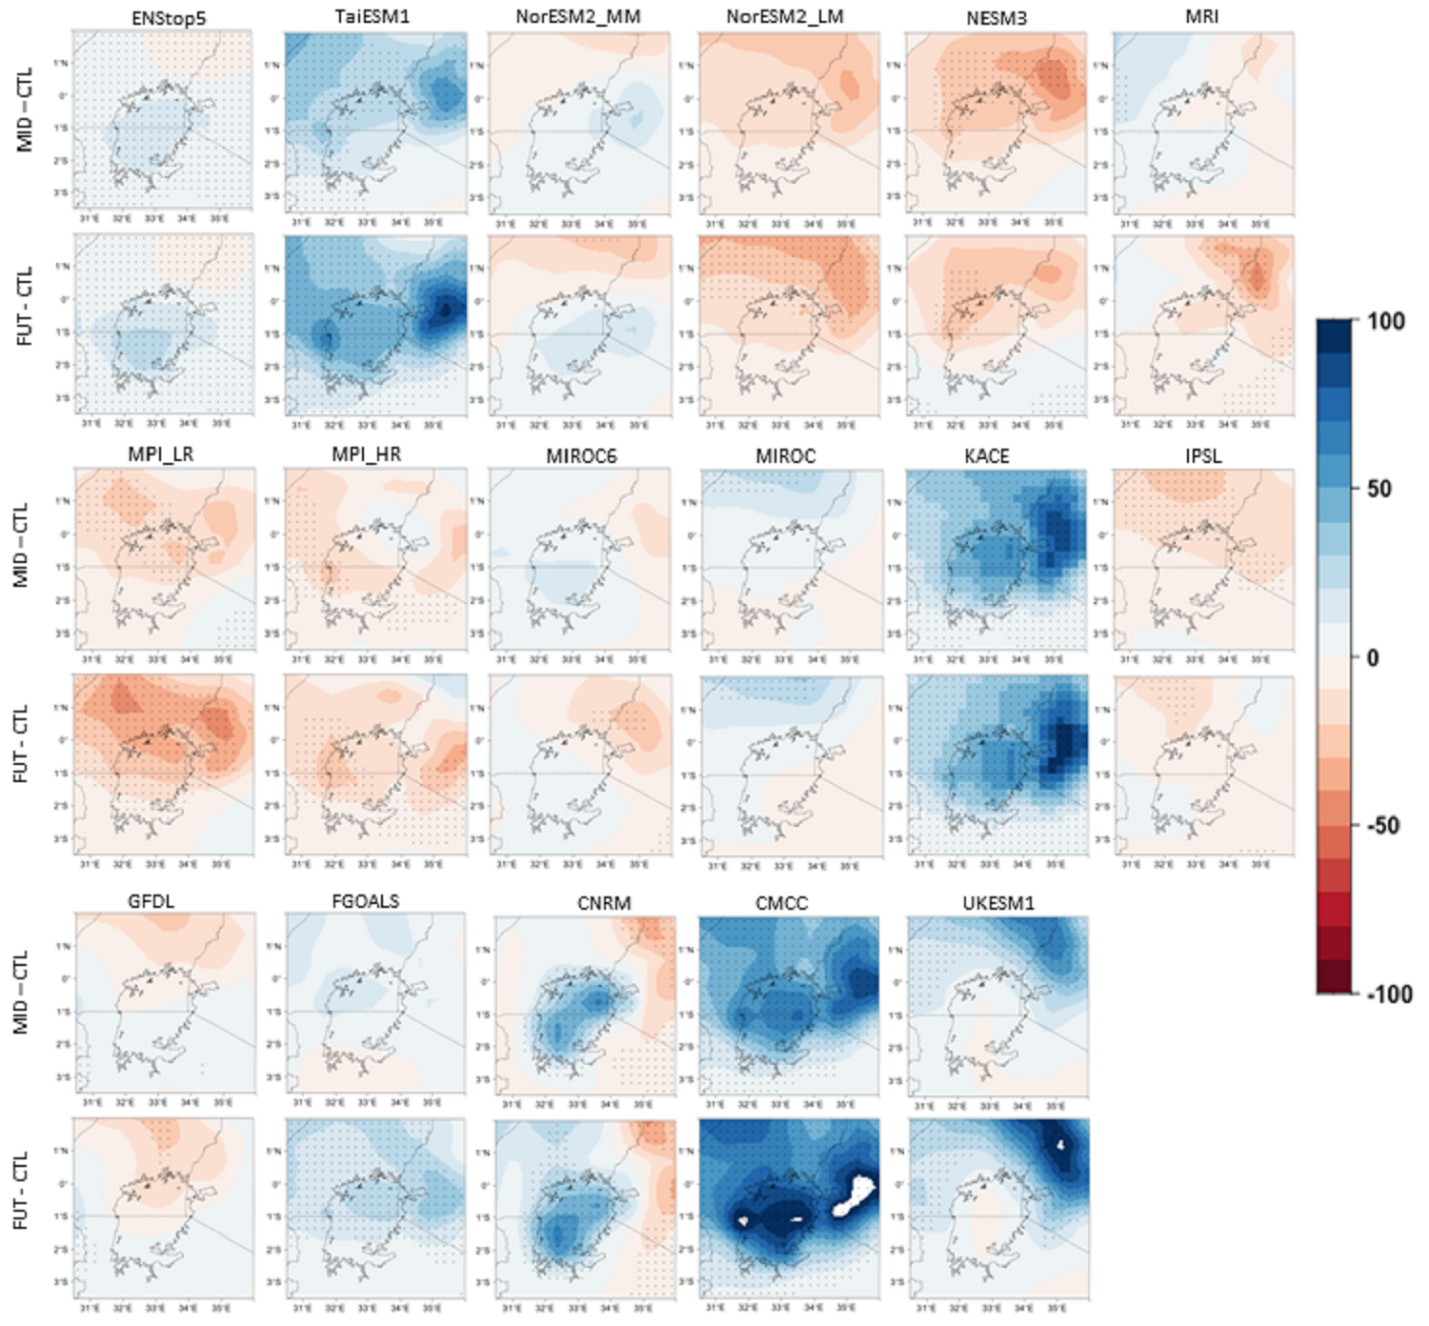


Fig. S 8: As in Fig. S 6 but for JJA


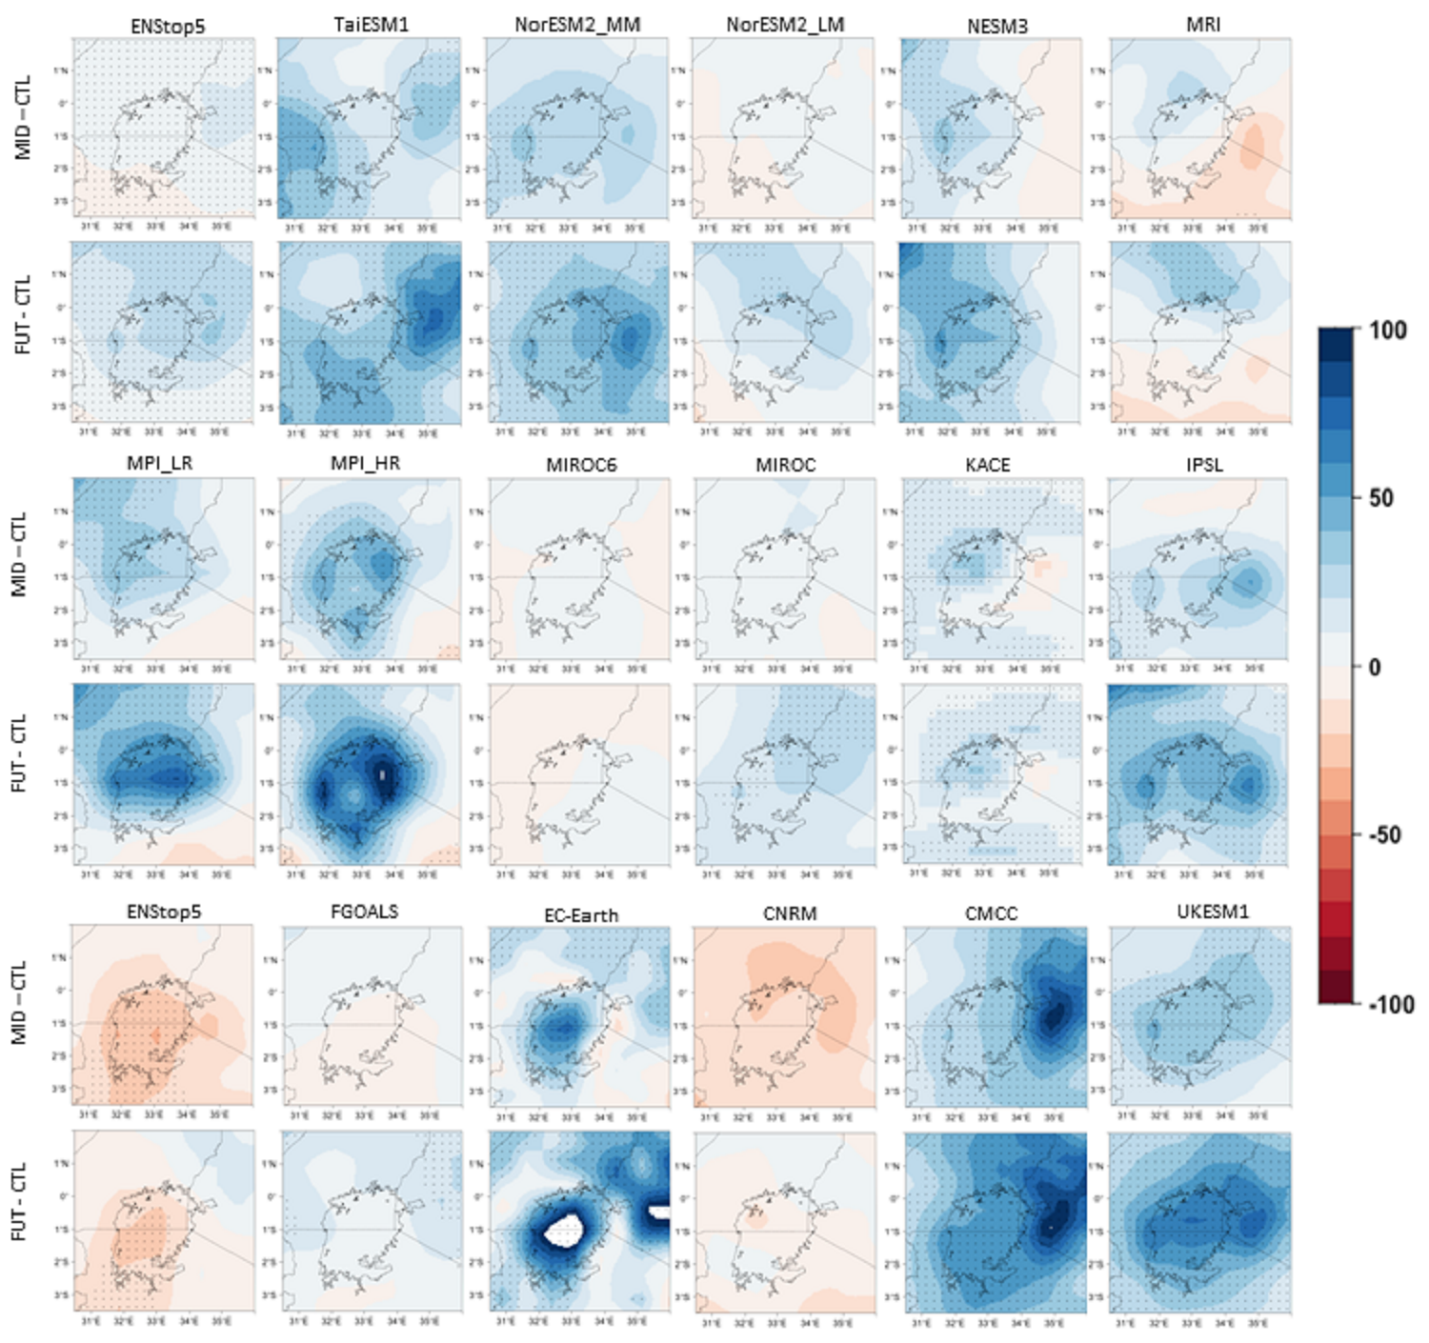


Fig. S 9: As in Fig. S 6 but for OND


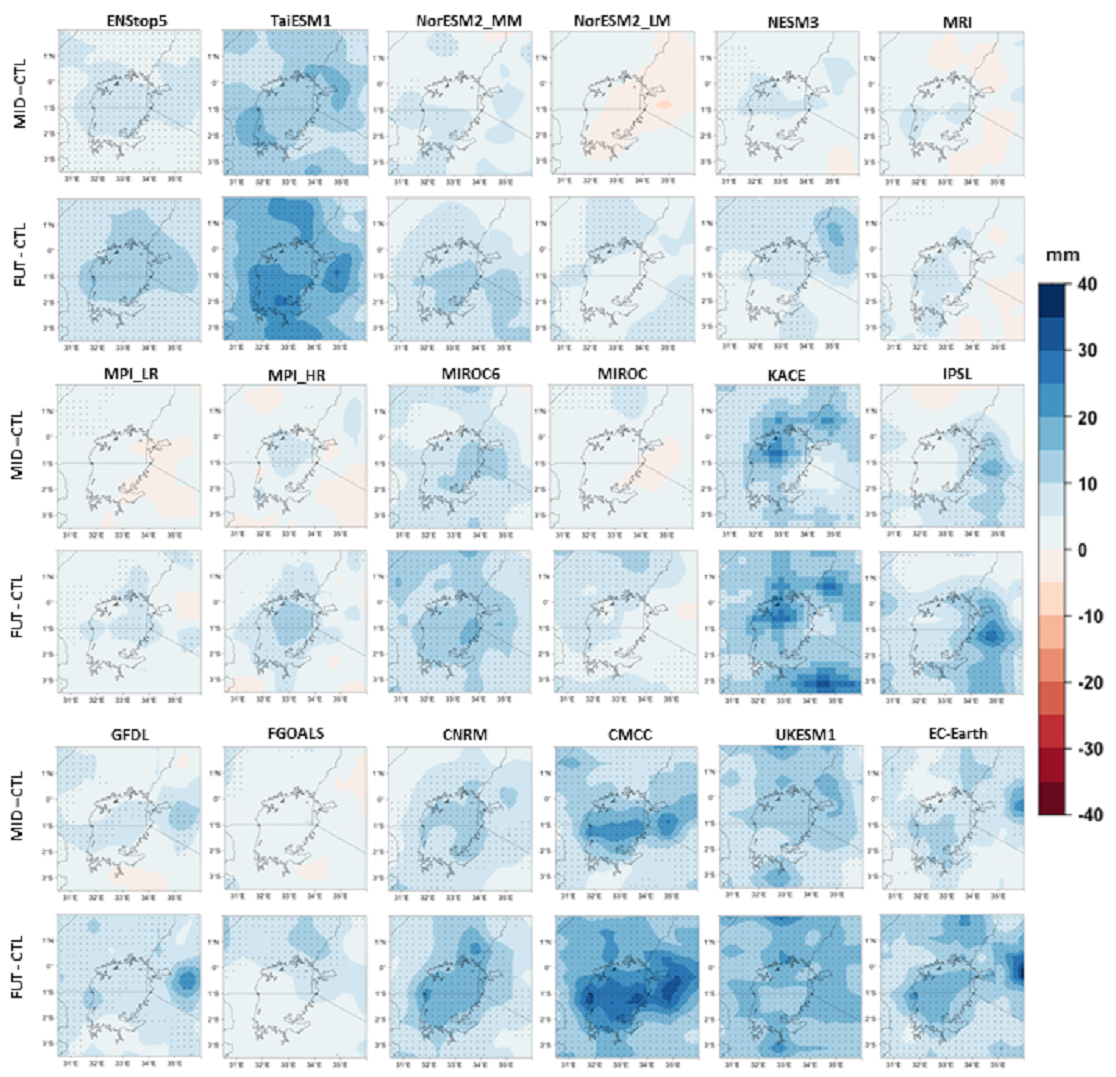


Fig. S 10: Changes in the maximum 5-day precipitation (Rx5day) climatology for the period 2040-2069 (MID-CTLl) and 2070-2099 (FUT-CTL) relative to the 1985-2014 period (CTL), for all models and an ensemble mean for the top-five models (ENStop5). Stippling shows significant values at 99% confidence level. All units are in mm


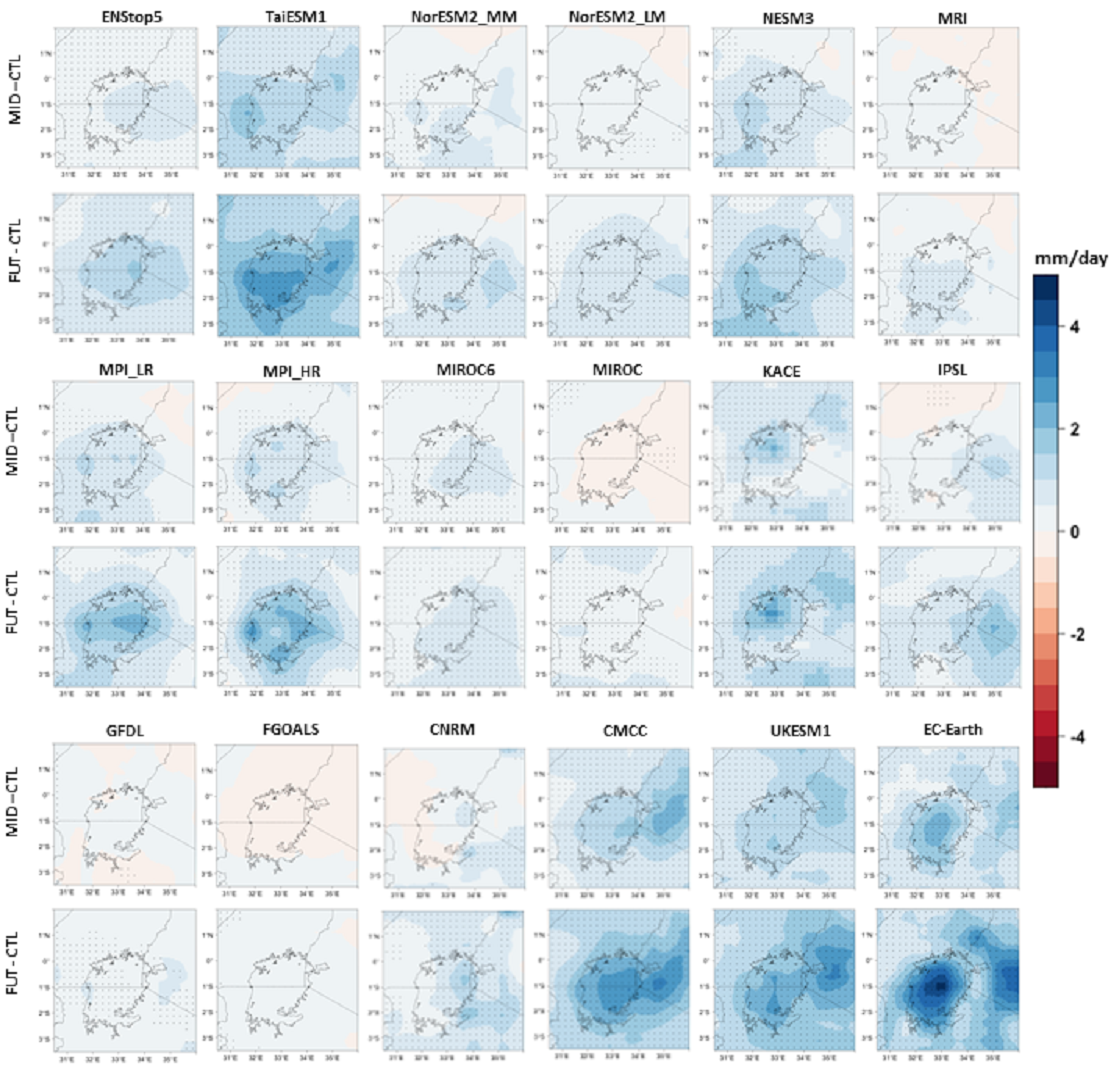


Fig. S 11: As in Fig. S 10 but for SDII


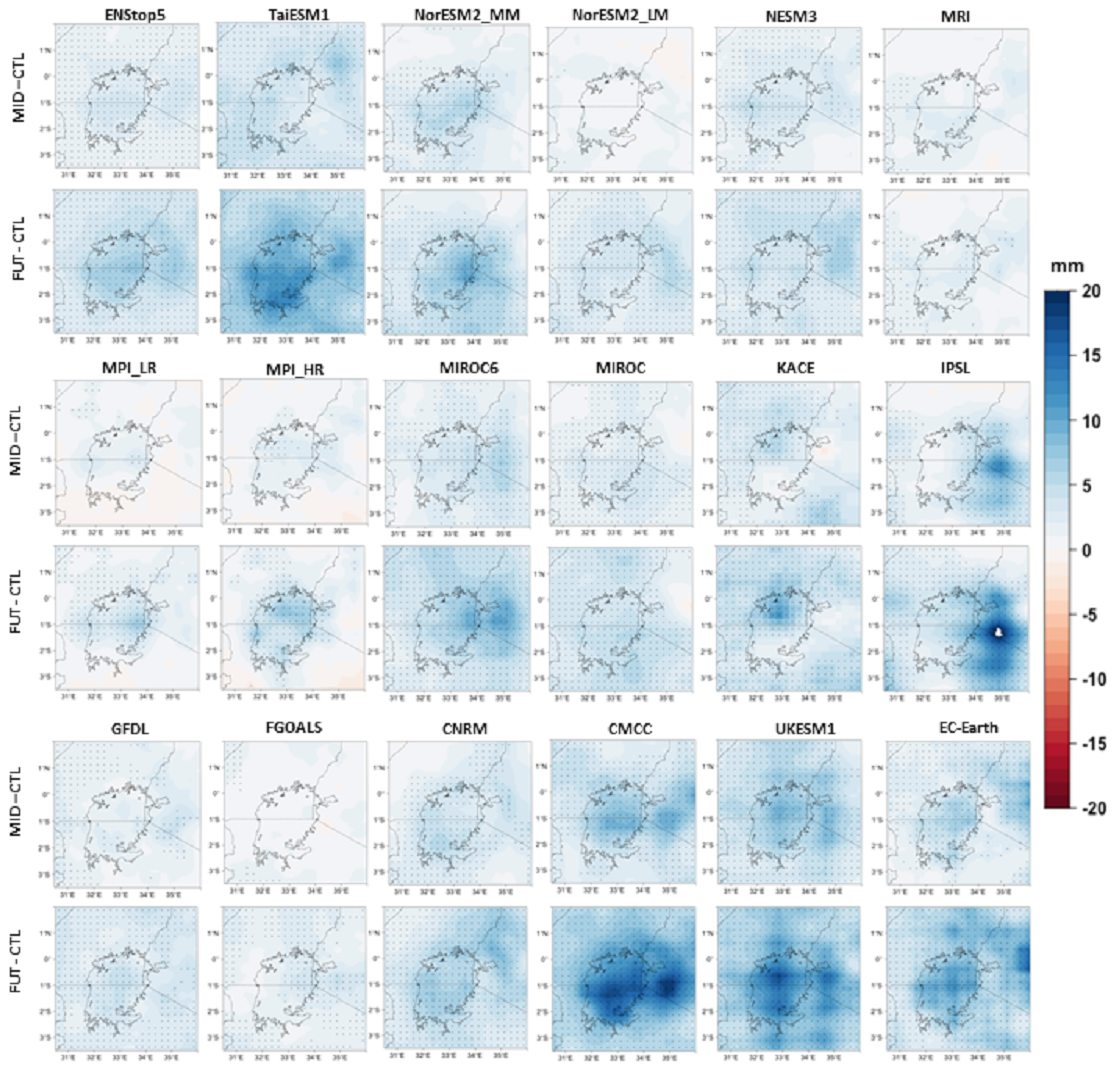


Fig. S 12: As in Fig. S 10 but for 99p90p. Units are in mm

# References

1. Cherchi, A. *et al.* Global mean climate and main patterns of variability in the CMCC‐CM2 coupled model. *J Adv Model Earth Syst* 2018MS001369 (2018) doi:10.1029/2018MS001369.

2. Voldoire, A. *et al.* Evaluation of CMIP6 DECK Experiments With CNRM‐CM6‐1. *J Adv Model Earth Syst* **11**, 2177–2213 (2019).

3. Döscher, R. *et al.* The EC-Earth3 Earth system model for the Coupled Model Intercomparison Project 6. *Geosci Model Dev* **15**, 2973–3020 (2022).

4. Li, L. *et al.* The Flexible Global Ocean‐Atmosphere‐Land System Model Grid‐Point Version 3 (FGOALS‐g3): Description and Evaluation. *J Adv Model Earth Syst* **12**, (2020).

5. Dunne, J. P. *et al.* The GFDL Earth System Model Version 4.1 (GFDL‐ESM 4.1): Overall Coupled Model Description and Simulation Characteristics. *J Adv Model Earth Syst* **12**, (2020).

6. Boucher, O. *et al.* Presentation and Evaluation of the IPSL‐CM6A‐LR Climate Model. *J Adv Model Earth Syst* **12**, (2020).

7. Lee, J. *et al.* Evaluation of the Korea Meteorological Administration Advanced Community Earth-System model (K-ACE). *Asia Pac J Atmos Sci* **56**, 381–395 (2020).

8. Hajima, T. *et al.* Development of the MIROC-ES2L Earth system model and the evaluation of biogeochemical processes and feedbacks. *Geosci Model Dev* **13**, 2197–2244 (2020).

9. Tatebe, H. *et al.* Description and basic evaluation of simulated mean state, internal variability, and climate sensitivity in MIROC6. *Geosci Model Dev* **12**, 2727–2765 (2019).

10. Müller, W. A. *et al.* A Higher‐resolution Version of the Max Planck Institute Earth System Model (MPI‐ESM1.2‐HR). *J Adv Model Earth Syst* **10**, 1383–1413 (2018).

11. Mauritsen, T. *et al.* Developments in the MPI‐M Earth System Model version 1.2 (MPI‐ESM1.2) and Its Response to Increasing CO 2. *J Adv Model Earth Syst* **11**, 998–1038 (2019).

12. Yukimoto, S. *et al.* The Meteorological Research Institute Earth System Model Version 2.0, MRI-ESM2.0: Description and Basic Evaluation of the Physical Component. *Journal of the Meteorological Society of Japan. Ser. II* **97**, 931–965 (2019).

13. Cao, J. *et al.* The NUIST Earth System Model (NESM) version 3: description and preliminary evaluation. *Geosci Model Dev* **11**, 2975–2993 (2018).

14. Seland, Ø. *et al.* Overview of the Norwegian Earth System Model (NorESM2) and key climate response of CMIP6 DECK, historical, and scenario simulations. *Geosci Model Dev* **13**, 6165–6200 (2020).

15. Lee, W.-L. *et al.* Taiwan Earth System Model Version 1: description and evaluation of mean state. *Geosci Model Dev* **13**, 3887–3904 (2020).

16. Sellar, A. A. *et al.* UKESM1: Description and Evaluation of the U.K. Earth System Model. *J Adv Model Earth Syst* **11**, 4513–4558 (2019).
